# Supplementary material
Source: PubMed Central journal article supplement (PMC1899267)
Supplement: ajrccm_175_10_1036__1.pdf [file ajrccm_175_10_1036__1.pdf]

## **Online Data Supplement**

### Heritability of Lung Disease Severity in Cystic Fibrosis

Lori L. Vanscoy, M.D., LCDR, MC, USNR, Scott M. Blackman, M.D., Ph.D.,  
Joseph M. Collaco, M.D., Amanda Bowers, Theresa Lai, Kathleen Naughton, R.N.,  
Marilyn Algire, M.S.N., Rita McWilliams, Ph.D., Suzanne Beck, M.D.,  
Julie Hoover-Fong, M.D., Ada Hamosh, M.D., Dave Cutler, Ph.D., and  
Garry R. Cutting, M.D.

**Table E1: Intra-pair Correlations for Cross-sectional and Longitudinal Measures of CF Lung Disease Severity for Twins and Siblings Less than 15 Years of Age and Greater than 15 Years of Age, Living Together**

|                                                             | MaxFEV1CF%               | AvgFEV1CF%               | EstFEV1%@20yrs           |
|-------------------------------------------------------------|--------------------------|--------------------------|--------------------------|
| MZ Twins, Both <15<br>Years of Age                          | 0.90 (14) <sup>*</sup>   | 0.94 (8) <sup>**</sup>   | 0.84 (7) <sup>***</sup>  |
| MZ Twins, Both >15<br>Years of Age                          | 0.88 (22) <sup>*</sup>   | 0.89 (25) <sup>*</sup>   | 0.85 (24) <sup>*</sup>   |
| Same Sex DZ Twins<br>and Siblings, Both <15<br>Years of Age | 0.55 (46) <sup>**</sup>  | 0.67 (31) <sup>*</sup>   | 0.51 (24) <sup>***</sup> |
| Same Sex DZ Twins<br>and Siblings, Both >15<br>Years of Age | 0.53 (16) <sup>***</sup> | 0.61 (16) <sup>***</sup> | 0.54 (15) <sup>***</sup> |

\* p-value < 0.0001

\*\* p-value < 0.001

\*\*\* p-value < 0.05

**Table E2: Correlations for Cross-Sectional and Longitudinal Measures of CF Lung Disease Severity in  $\Delta$ F508 Homozygous Twins and Siblings Living Together at Home**

|                                                                   | <b>Max-<br/>FEV1CF%<br/>(n)</b>     | <b>EstFEV1%<br/>@20yrs<sup>†</sup><br/>(n)</b> | <b>Adjusted<sup>1</sup><br/>EstFEV1%<br/>@20yrs (n)</b> | <b>AvgFEV1-<br/>CF%<sup>††</sup> (n)</b> | <b>Adjusted<sup>2</sup><br/>AvgFEV1-<br/>CF% (n)</b> |
|-------------------------------------------------------------------|-------------------------------------|------------------------------------------------|---------------------------------------------------------|------------------------------------------|------------------------------------------------------|
| Monozygous Twins                                                  | 0.92 ± 0.01<br>(23) <sup>*</sup>    | 0.86 ± 0.02<br>(22) <sup>*</sup>               | 0.82 ± 0.02<br>(22) <sup>*</sup>                        | 0.93 ± 0.01<br>(22) <sup>*</sup>         | 0.90 ± 0.01<br>(20) <sup>*</sup>                     |
| Dizygous Twins                                                    | 0.59 ± 0.13<br>(4)                  | -0.18 ± 0.60<br>(3)                            | 0.61 ± 0.24<br>(3)                                      | 0.40 ± 0.37<br>(3)                       | 0.75 ± 0.10<br>(3)                                   |
| Siblings                                                          | 0.28 ± 0.01<br>(93) <sup>****</sup> | 0.36 ± 0.02<br>(48)                            | 0.46 ± 0.02<br>(48) <sup>****</sup>                     | 0.41 ± 0.01<br>(67) <sup>**</sup>        | 0.38 ± 0.01<br>(64) <sup>***</sup>                   |
| Same Sex Siblings, <3<br>years difference in age                  | 0.50 ± 0.02<br>(31) <sup>****</sup> | 0.59 ± 0.03<br>(21) <sup>****</sup>            | 0.45 ± 0.04<br>(21)                                     | 0.54 ± 0.02<br>(26) <sup>***</sup>       | 0.51 ± 0.02<br>(25) <sup>**</sup>                    |
| Same Sex DZ Twins<br>and Siblings, < 3 years<br>difference in age | 0.49 ± 0.02<br>(34) <sup>****</sup> | 0.58 ± 0.03<br>(23) <sup>****</sup>            | 0.44 ± 0.03<br>(23)                                     | 0.53 ± 0.02<br>(28) <sup>***</sup>       | 0.51 ± 0.02<br>(27) <sup>****</sup>                  |

<sup>1</sup> EstFEV1%@20yrs adjusted for AvgBMIZ and for pancreatic status

<sup>2</sup> AvgFEV1CF% adjusted for AvgBMIZ

<sup>†</sup> Using minimum of 5 years of PFT data

<sup>††</sup> Using minimum of 4 years of PFT data

<sup>\*</sup> p-value < 0.0001

<sup>\*\*</sup> p-value < 0.001

\*\*\* p-value < 0.005

\*\*\*\* p-value < 0.01
